# Supplementary material for: Distinctive Gene Expression Profiles and Effectors Consistent With Host Specificity in Two Formae Speciales of Marssonina brunnea
Source: Front Microbiol. 2020 Mar 10;11:276. doi: 10.3389/fmicb.2020.00276 (PMC7076119; doi:10.3389/fmicb.2020.00276)
Supplement: Supplementary file 9 [file Table_9.xlsx]

## Sheet: Sheet1
Supplementary Table S9: The up-changed DEG unigenes expressed in common to three infection times for the M. brunnea formae speciales with eggNOGs and NR annotations
Phase	Forma specialis	#ID	eggNOG_class	eggNOG_class_annotation	NR_annotation	Degrading-enzyme substrates
common	MULT	BMK_Unigene_02119	G	Carbohydrate transport and metabolism	endo-beta-1,4-glucanase precursor	carbohydrate
common	MULT	BMK_Unigene_07200	G	Carbohydrate transport and metabolism	endopolygalacturonase	carbohydrate
common	MULT	BMK_Unigene_15381	G	Carbohydrate transport and metabolism	pectate lyase A	carbohydrate
common	MULT	BMK_Unigene_07675	G	Carbohydrate transport and metabolism	polysaccharide lyase family 1 protein	carbohydrate
common	MULT	BMK_Unigene_04293	R	General function prediction only	acetylxylan esterase precursor	lipid
common	MULT	BMK_Unigene_04196	R	General function prediction only	endonuclease/Exonuclease/phosphatase	carbohydrate
common	MULT	BMK_Unigene_03204	R	General function prediction only	glycosyl hydrolase family 61	carbohydrate
common	MULT	BMK_Unigene_14908	R	General function prediction only	pectin lyase A precursor	carbohydrate
common	MULT	BMK_Unigene_06291	R	General function prediction only	putative mannan endo-1,4-beta-mannosidase	carbohydrate
common	MULT	BMK_Unigene_08255	O	Posttranslational modification, protein turnover, chaperones	cell wall glucanase	carbohydrate
common	MULT	BMK_Unigene_05421	O	Posttranslational modification, protein turnover, chaperones	subtilisin-like serine protease PR1C	protease
common	MULT	BMK_Unigene_09398	K	Transcription	cutinase G-box binding protein	carbohydrate
common	MULT	BMK_Unigene_12152	--	--	phosphorylcholine phosphatase	carbohydrate
common	MULT	BMK_Unigene_03333	--	--	putative cell wall-associated hydrolase	carbohydrate
common	MONO	BMK_Unigene_23925	--	--	putative cell wall-associated hydrolase	carbohydrate
common	MULT	BMK_Unigene_10720	--	--	putative endoglucanase II	carbohydrate
common	MULT	BMK_Unigene_12821	--	--	metalloprotease	protease
common	MULT	BMK_Unigene_15608	--	--	metalloprotease	protease
common	MULT	BMK_Unigene_02061	R	General function prediction only	putative Ecp7(P20)
common	MULT	BMK_Unigene_03019	R	General function prediction only	putative Ecp7(P20)
common	MULT	BMK_Unigene_04762	R	General function prediction only	putative Ecp7(P20)
common	MULT	BMK_Unigene_07188	R	General function prediction only	putative Ecp7(P20)
common	MULT	BMK_Unigene_13082	R	General function prediction only	putative Ecp7(P20)
common	MULT	BMK_Unigene_31512	E	Amino acid transport and metabolism	N-acetylglutamate kinase
common	MULT	BMK_Unigene_07046	G	Carbohydrate transport and metabolism	BNR/Asp-box repeat domain containing protein
common	MULT	BMK_Unigene_34523	G	Carbohydrate transport and metabolism	channel-like protein
common	MULT	BMK_Unigene_06700	G	Carbohydrate transport and metabolism	extracellular chitinase
common	MULT	BMK_Unigene_10604	G	Carbohydrate transport and metabolism	invertase precursor
common	MULT	BMK_Unigene_18305	G	Carbohydrate transport and metabolism	LPXTG-motif cell wall anchor domain protein
common	MULT	BMK_Unigene_06410	M	Cell wall/membrane/envelope biogenesis	conserved domain protein (ISS)
common	MONO	BMK_Unigene_46850	M	Cell wall/membrane/envelope biogenesis	conserved domain protein (ISS)
common	MULT	BMK_Unigene_06618	H	Coenzyme transport and metabolism	pyruvate decarboxylase
common	MONO	BMK_Unigene_32314	R	General function prediction only	glucose-methanol-choline (gmc) oxidoreductase
common	MULT	BMK_Unigene_03396	R	General function prediction only	GMC oxidoreductase
common	MONO	BMK_Unigene_16903	K	Transcription	--
common	MULT	BMK_Unigene_04792	K	Transcription	MYB DNA-binding domain-containing protein
common	MONO	BMK_Unigene_33750	R	General function prediction only	hypothetical protein MBM_06421
common	MULT	BMK_Unigene_13091	R	General function prediction only	hypothetical protein MBM_07277
common	MULT	BMK_Unigene_02969	S	Function unknown	hypothetical protein MBM_06390
common	MONO	BMK_Unigene_34128	S	Function unknown	hypothetical protein MBM_06796
common	MULT	BMK_Unigene_07604	R	General function prediction only	GPI anchored cell wall protein
common	MULT	BMK_Unigene_08641	R	General function prediction only	immunogenic protein
common	MULT	BMK_Unigene_04599	R	General function prediction only	major facilitator superfamily transporter
common	MULT	BMK_Unigene_08662	R	General function prediction only	methyltransferase domain-containing protein
common	MULT	BMK_Unigene_26725	R	General function prediction only	pentatricopeptide repeat-containing protein
common	MULT	BMK_Unigene_06416	R	General function prediction only	polyamine transporter
common	MULT	BMK_Unigene_04701	R	General function prediction only	putative glucooligosaccharide oxidase
common	MULT	BMK_Unigene_04562	R	General function prediction only	quinate permease
common	MULT	BMK_Unigene_08644	R	General function prediction only	rhamnogalacturonan acetylesterase precursor
common	MULT	BMK_Unigene_02036	R	General function prediction only	ricin B lectin
common	MULT	BMK_Unigene_07093	R	General function prediction only	siderophore iron transporter mirB
common	MULT	BMK_Unigene_07832	R	General function prediction only	transmembrane protein
common	MULT	BMK_Unigene_14972	R	General function prediction only	2OG-Fe(II) oxygenase superfamily protein
common	MULT	BMK_Unigene_12402	R	General function prediction only	AMP-1 precursor
common	MULT	BMK_Unigene_06376	R	General function prediction only	choline dehydrogenase
common	MULT	BMK_Unigene_11375	R	General function prediction only	extracellular matrix protein
common	MULT	BMK_Unigene_03674	R	General function prediction only	FAD dependent oxidoreductase family protein
common	MULT	BMK_Unigene_06106	R	General function prediction only	fungal cellulose binding domain-containing protein
common	MULT	BMK_Unigene_13508	R	General function prediction only	fungal cellulose binding domain-containing protein
common	MULT	BMK_Unigene_07654	P	Inorganic ion transport and metabolism	calcium-translocating P-type ATPase
common	MULT	BMK_Unigene_07035	U	Intracellular trafficking, secretion, and vesicular transport	synaptobrevin
common	MULT	BMK_Unigene_03311	O	Posttranslational modification, protein turnover, chaperones	endoplasmic Reticulum Oxidoreductin 1
common	MULT	BMK_Unigene_31737	A	RNA processing and modification	--
common	MULT	BMK_Unigene_15286	Q	Secondary metabolites biosynthesis, transport and catabolism	cytochrome P450
common	MULT	BMK_Unigene_10456	Q	Secondary metabolites biosynthesis, transport and catabolism	homogentisate 1,2-dioxygenase
common	MULT	BMK_Unigene_01040	Q	Secondary metabolites biosynthesis, transport and catabolism	leptomycin B resistance protein pmd1
common	MULT	BMK_Unigene_04994	S	Function unknown	amino acid permease
common	MULT	BMK_Unigene_08361	S	Function unknown	DUF1479 domain protein
common	MULT	BMK_Unigene_09036	S	Function unknown	NAD dependent epimerase/dehydratase
common	MULT	BMK_Unigene_07854	S	Function unknown	nuclear migration protein
common	MULT	BMK_Unigene_05608	S	Function unknown	prolipoprotein diacylglyceryl transferase
common	MULT	BMK_Unigene_47233	S	Function unknown	putative membrane protein
common	MULT	BMK_Unigene_10631	S	Function unknown	putative protein RTA1
common	MULT	BMK_Unigene_41090	J	Translation, ribosomal structure and biogenesis	predicted protein
common	MULT	BMK_Unigene_03251	--	--	conserved hypothetical protein
common	MULT	BMK_Unigene_38446	--	--	LOW QUALITY PROTEIN: conserved hypothetical protein
common	MULT	BMK_Unigene_07021	G	Carbohydrate transport and metabolism	hypothetical protein MBM_05573
common	MULT	BMK_Unigene_24910	J	Translation, ribosomal structure and biogenesis	hypothetical protein
common	MULT	BMK_Unigene_03620	R	General function prediction only	hypothetical protein MBM_01389
common	MULT	BMK_Unigene_12700	R	General function prediction only	hypothetical protein MBM_02183
common	MULT	BMK_Unigene_07250	R	General function prediction only	hypothetical protein MBM_02939
common	MULT	BMK_Unigene_03728	R	General function prediction only	hypothetical protein MBM_04331
common	MULT	BMK_Unigene_13790	R	General function prediction only	hypothetical protein MBM_04511
common	MULT	BMK_Unigene_18866	R	General function prediction only	hypothetical protein MBM_04523
common	MULT	BMK_Unigene_10566	R	General function prediction only	hypothetical protein MBM_07463
common	MULT	BMK_Unigene_07333	R	General function prediction only	hypothetical protein MBM_08215
common	MULT	BMK_Unigene_08797	R	General function prediction only	hypothetical protein MBM_08313
common	MULT	BMK_Unigene_10799	R	General function prediction only	hypothetical protein MBM_08471
common	MULT	BMK_Unigene_07307	R	General function prediction only	hypothetical protein MBM_09600
common	MULT	BMK_Unigene_38173	S	Function unknown	hypothetical protein F947_00014, partial
common	MULT	BMK_Unigene_10634	S	Function unknown	hypothetical protein MBM_00823
common	MULT	BMK_Unigene_06976	S	Function unknown	hypothetical protein MBM_03268
common	MULT	BMK_Unigene_06088	S	Function unknown	hypothetical protein MBM_06337
common	MULT	BMK_Unigene_12190	S	Function unknown	hypothetical protein MBM_07694
common	MULT	BMK_Unigene_02363	S	Function unknown	hypothetical protein MBM_07809
common	MULT	BMK_Unigene_05820	S	Function unknown	hypothetical protein MBM_08461
common	MULT	BMK_Unigene_06970	U	Intracellular trafficking, secretion, and vesicular transport	hypothetical protein MBM_02340
common	MULT	BMK_Unigene_26783	Z	Cytoskeleton	hypothetical protein, partial
common	MULT	BMK_Unigene_01151	--	--	hypothetical protein, partial
common	MULT	BMK_Unigene_02819	--	--	hypothetical protein MBM_10023
common	MULT	BMK_Unigene_11978	--	--	hypothetical protein MBM_10022
common	MULT	BMK_Unigene_06823	--	--	hypothetical protein MBM_09570
common	MULT	BMK_Unigene_10673	--	--	hypothetical protein MBM_09490
common	MULT	BMK_Unigene_04602	--	--	hypothetical protein MBM_09420
common	MULT	BMK_Unigene_05052	--	--	hypothetical protein MBM_09209
common	MULT	BMK_Unigene_07657	--	--	hypothetical protein MBM_09209
common	MULT	BMK_Unigene_07174	--	--	hypothetical protein MBM_09145
common	MULT	BMK_Unigene_18261	--	--	hypothetical protein MBM_09067
common	MULT	BMK_Unigene_18262	--	--	hypothetical protein MBM_09067
common	MULT	BMK_Unigene_07154	--	--	hypothetical protein MBM_08818
common	MULT	BMK_Unigene_11346	--	--	hypothetical protein MBM_08294
common	MULT	BMK_Unigene_10089	--	--	hypothetical protein MBM_07612
common	MULT	BMK_Unigene_06948	--	--	hypothetical protein MBM_07491
common	MULT	BMK_Unigene_07381	--	--	hypothetical protein MBM_07276
common	MULT	BMK_Unigene_17434	--	--	hypothetical protein MBM_07162
common	MULT	BMK_Unigene_13817	--	--	hypothetical protein MBM_06557
common	MULT	BMK_Unigene_13773	--	--	hypothetical protein MBM_06455
common	MULT	BMK_Unigene_10459	--	--	hypothetical protein MBM_06421
common	MULT	BMK_Unigene_09978	--	--	hypothetical protein MBM_06256
common	MULT	BMK_Unigene_05049	--	--	hypothetical protein MBM_05353
common	MULT	BMK_Unigene_09394	--	--	hypothetical protein MBM_05217
common	MULT	BMK_Unigene_12206	--	--	hypothetical protein MBM_05145
common	MULT	BMK_Unigene_14392	--	--	hypothetical protein MBM_04511
common	MULT	BMK_Unigene_03341	--	--	hypothetical protein MBM_04139
common	MULT	BMK_Unigene_24633	--	--	hypothetical protein MBM_03364
common	MULT	BMK_Unigene_16390	--	--	hypothetical protein MBM_03298
common	MULT	BMK_Unigene_14548	--	--	hypothetical protein MBM_02283
common	MULT	BMK_Unigene_14593	--	--	hypothetical protein MBM_02130
common	MULT	BMK_Unigene_04446	--	--	hypothetical protein MBM_01889
common	MULT	BMK_Unigene_09971	--	--	hypothetical protein MBM_01033
common	MULT	BMK_Unigene_24593	--	--	hypothetical protein MBM_00721
common	MULT	BMK_Unigene_06167	--	--	hypothetical protein MBM_00254
common	MULT	BMK_Unigene_47180	--	--	hypothetical protein
