# Supplementary material for: Distinctive Gene Expression Profiles and Effectors Consistent With Host Specificity in Two Formae Speciales of Marssonina brunnea
Source: Front Microbiol. 2020 Mar 10;11:276. doi: 10.3389/fmicb.2020.00276 (PMC7076119; doi:10.3389/fmicb.2020.00276)
Supplement: Supplementary file 14 [file Table_14.xlsx]

## Sheet: Sheet1
Supplementary Table S14: Unigenes homologue to secretory protein and candidate effector genes expressed in up-regulation in common during infection course for M. brunnea formae speciales
attributes	Stage	Forma specialis	#ID	T26_T27_T30_vs_T05_T11_T17_DESeq_FDR	T26_T27_T30_vs_T05_T11_T17_DESeq_log2FC	T26_T27_T30_vs_T05_T11_T17_DESeq_(FDR_0.05_FC_2)_regulated	T26_T27_T30_vs_T06_T18_T21_DESeq_FDR	T26_T27_T30_vs_T06_T18_T21_DESeq_log2FC	T26_T27_T30_vs_T06_T18_T21_DESeq_(FDR_0.05_FC_2)_regulated	T26_T27_T30_vs_T12_T28_T29_DESeq_FDR	T26_T27_T30_vs_T12_T28_T29_DESeq_log2FC	T26_T27_T30_vs_T12_T28_T29_DESeq_(FDR_0.05_FC_2)_regulated	eggNOG_class	eggNOG_class_annotation	NR_annotation	UniPort	e-value	effector	no-tmhmm	PHI-name	PHI-gene	PHI-function	PHI-species	PHI-evalue	PHI-annotated
secretary protein	common	MULT	BMK_Unigene_05421	0.00134502	5.89098	up	1.41e-09	6.22637	up	2.01e-47	5.67065	up	O	Posttranslational modification, protein turnover, chaperones	subtilisin-like serine protease PR1C	C7Z0E6	2e-107	#N/A	len=929	A4VXV9	SspA-1	reduced_virulence	Streptococcus_suis	5e-15	yes
secretary protein	common	MULT	BMK_Unigene_03333	2.14e-06	3.60135	up	2.8e-29	6.48713	up	1.29e-40	7.7434	up	--	--	putative cell wall-associated hydrolase	B3VBK9	1e-14	#N/A	len=178	F9XMT4	Mg3LysM	effector_(plant_avirulence_determinant)	Zymoseptoria_tritici	3e-19	yes
secretary protein	common	MULT	BMK_Unigene_12821	0.00111123	5.4097	up	1.02e-09	5.89839	up	2.24e-14	6.19921	up	--	--	metalloprotease	B2AC45	2e-57	#N/A	len=287	C5P3X6	MEP1	reduced_virulence	Coccidioides_posadasii	4e-50	yes
secretary protein	common	MULT	BMK_Unigene_15608	0.000687013	6.79006	up	1.13e-07	6.9552	up	4.32e-16	6.44848	up	--	--	metalloprotease	B2AC45	1e-44	#N/A	len=306	C5P3X6	MEP1	reduced_virulence	Coccidioides_posadasii	5e-39	yes
secretary protein	common	MULT	BMK_Unigene_15381	0.000552091	5.19116	up	0.00271718	4.12364	up	1.54e-11	4.50834	up	G	Carbohydrate transport and metabolism	pectate lyase A	A1CYB8	6e-87	#N/A	len=330	G8AA67	CcpelA	increased_virulence_(hypervirulence)	Colletotrichum_coccodes	4e-67	yes
secretary protein	common	MULT	BMK_Unigene_06700	3.31e-05	4.25696	up	6.19e-23	5.77886	up	3.61e-60	7.32032	up	G	Carbohydrate transport and metabolism	extracellular chitinase	C9K5U2	4e-91	#N/A	len=325	O59928	CHT42	reduced_virulence	Trichoderma_virens	2e-17	yes
secretary protein	common	MULT	BMK_Unigene_07675	0.0455431	2.70978	up	1.82e-06	3.68393	up	3.15e-32	4.54409	up	G	Carbohydrate transport and metabolism	polysaccharide lyase family 1 protein	C7Z5D3	2e-18	#N/A	len=492	O59939	PELB	reduced_virulence	Colletotrichum_gloeosporioides	6e-16	yes
secretary protein	common	MULT	BMK_Unigene_07021	0.0489306	3.99567	up	1.84e-05	3.33947	up	1.58e-32	4.10594	up	G	Carbohydrate transport and metabolism	hypothetical protein MBM_05573	H0EHP5	1e-63	#N/A	len=1013	O93841	CHIP6	reduced_virulence	Colletotrichum_gloeosporioides	e-141	yes
secretary protein	common	MULT	BMK_Unigene_46691	3.57e-18	Inf	up	2.3e-18	Inf	up	2.08e-11	Inf	up	Z	Cytoskeleton	alpha-tubulin, partial	E7KG47	5e-14	#N/A	len=70	Q4WKG5	TUB1	lethal__loss_of_pathogenicity	Aspergillus_fumigatus	7e-25	yes
secretary protein	common	MULT	BMK_Unigene_05608	0.0151089	2.54896	up	5.6e-06	2.79571	up	8.13e-17	2.74355	up	S	Function unknown	prolipoprotein diacylglyceryl transferase	A5DZD4	8e-11	#N/A	len=1236	Q8E473	xf	reduced_virulence	Streptococcus_agalactiae	4e-12	yes
secretary protein	common	MULT	BMK_Unigene_07333	7.8e-07	3.84357	up	2.72e-08	4.0257	up	2.45e-35	5.2166	up	R	General function prediction only	hypothetical protein MBM_08215	J9XN37	5e-42	#N/A	len=143	B3VBK9	Ecp6	effector_(plant_avirulence_determinant)	Passalora_fulva__Fusarium_oxysporum	1e-05	yes
secretary protein	common	MULT	BMK_Unigene_04293	0.000990244	6.36596	up	1.39e-06	5.90701	up	1.96e-55	7.22247	up	R	General function prediction only	acetylxylan esterase precursor	A1CD34	2e-89	#N/A	len=336	Q2VF46	MfCUT1	increased_virulence_(hypervirulence)	Monilinia_fructicola	6e-09	yes
secretary protein	common	MULT	BMK_Unigene_03396	0.00607388	5.40488	up	0.0330238	6.1802	up	5.62e-52	7.9739	up	R	General function prediction only	GMC oxidoreductase	A7ELR7	1e-172	#N/A	len=541	Q9P304	AOX1	reduced_virulence	Passalora_fulva	4e-12	yes
secretary protein	common	MULT	BMK_Unigene_06376	3.86e-06	6.47849	up	1.7e-07	4.79955	up	0.0025932	1.81139	up	R	General function prediction only	choline dehydrogenase	B0XT73	6e-158	#N/A	len=793	Q9P304	AOX1	reduced_virulence	Passalora_fulva	5e-12	yes
secretary protein	common	MULT	BMK_Unigene_14908	7.63e-12	6.69105	up	0.00118078	7.03609	up	1.71e-33	8.00983	up	R	General function prediction only	pectin lyase A precursor	B2VQV4	6e-89	#N/A	len=380	T2C7K6	pnl1	reduced_virulence	Penicillium_digitatum	1e-73	yes
secretary protein	common	MULT	BMK_Unigene_10456	3.11e-18	6.56247	up	0.000183568	5.73718	up	0.000629699	2.49285	up	Q	Secondary metabolites biosynthesis, transport and catabolism	homogentisate 1,2-dioxygenase	I1RQV0	9e-98	#N/A	len=488	A7MVT5	hmgA	reduced_virulence	Vibrio_campbellii	4e-09	yes
secretary protein	common	MULT	BMK_Unigene_17434	6.56e-08	3.23628	up	5.61e-07	3.19963	up	6.97e-21	2.79209	up	--	--	hypothetical protein MBM_07162	E9FAC9	2e-08	#N/A	len=474	I1RD96	FGSG_01588_(Sc_gpi7)	unaffected_pathogenicity	Fusarium_graminearum	3e-15	yes
secretary protein	common	MULT	BMK_Unigene_07174	5.89e-18	5.25626	up	4.66e-08	3.20719	up	8.87e-41	4.55491	up	--	--	hypothetical protein MBM_09145	A1CPL3	3e-68	#N/A	len=355	I1RPX8	GzOB021	unaffected_pathogenicity	Fusarium_graminearum	2e-62	yes
secretary protein	common	MULT	BMK_Unigene_12700	1.37e-06	3.12794	up	0.00138501	1.87458	up	3.38e-20	2.74929	up	R	General function prediction only	hypothetical protein MBM_02183	A1CPL3	1e-71	#N/A	len=343	I1RPX8	GzOB021	unaffected_pathogenicity	Fusarium_graminearum	2e-60	yes
secretary protein	common	MULT	BMK_Unigene_03204	2.82e-11	4.58094	up	2.98e-05	2.818	up	1.23e-13	3.88739	up	R	General function prediction only	glycosyl hydrolase family 61	C7Z9N2	2e-90	#N/A	len=319	I1RPX8	GzOB021	unaffected_pathogenicity	Fusarium_graminearum	1e-32	yes
secretary protein	common	MONO	BMK_Unigene_23925	0.0204404	2.62241	up	9.41e-67	7.63083	up	0.000370948	5.59928	up	--	--	putative cell wall-associated hydrolase	A2Q817	2e-13	#N/A	ExpAA=10.73	F9XMT4	Mg3LysM	effector_(plant_avirulence_determinant)	Zymoseptoria_tritici	5e-20	yes
secretary protein	common	MONO	BMK_Unigene_32314	0.0218033	1.65409	up	9.1e-24	2.76936	up	5.65e-05	2.30817	up	R	General function prediction only	glucose-methanol-choline (gmc) oxidoreductase	A8NN89	2e-66	#N/A	ExpAA=3.21	Q9P304	AOX1	reduced_virulence	Passalora_fulva	2e-30	yes
secretary protein	common	MULT	BMK_Unigene_13508	2.62e-24	9.87774	up	0.000283852	8.45979	up	1.36e-66	9.87217	up	R	General function prediction only	fungal cellulose binding domain-containing protein	A1C8S4	9e-59	#N/A	len=282	#N/A	#N/A	#N/A	#N/A	#N/A	No
secretary protein	common	MULT	BMK_Unigene_24910	4.32e-19	Inf	up	2.8e-34	Inf	up	1.37e-68	Inf	up	J	Translation, ribosomal structure and biogenesis	hypothetical protein	A5AA93	1e-22	#N/A	len=69	#N/A	#N/A	#N/A	#N/A	#N/A	No
secretary protein	common	MULT	BMK_Unigene_02119	0.0413553	4.585	up	9.55e-11	5.44164	up	1.88e-41	6.13591	up	G	Carbohydrate transport and metabolism	endo-beta-1,4-glucanase precursor	A7E584	1e-120	#N/A	len=362	#N/A	#N/A	#N/A	#N/A	#N/A	No
secretary protein	common	MULT	BMK_Unigene_07604	0.0224971	2.02905	up	6.48e-07	3.25354	up	4.11e-25	3.16518	up	R	General function prediction only	GPI anchored cell wall protein	A7ECV7	1e-28	#N/A	len=183	#N/A	#N/A	#N/A	#N/A	#N/A	No
secretary protein	common	MULT	BMK_Unigene_10604	0.0369141	7.80286	up	7.71e-10	7.31489	up	3.83e-21	6.88145	up	G	Carbohydrate transport and metabolism	invertase precursor	A7EPD5	2e-122	#N/A	len=361	#N/A	#N/A	#N/A	#N/A	#N/A	No
secretary protein	common	MULT	BMK_Unigene_06970	7.77e-08	4.07114	up	0.000156266	3.36343	up	1.01e-22	3.96715	up	U	Intracellular trafficking, secretion, and vesicular transport	hypothetical protein MBM_02340	A7F2A1	2e-52	#N/A	len=266	#N/A	#N/A	#N/A	#N/A	#N/A	No
secretary protein	common	MULT	BMK_Unigene_08797	0.000629711	2.06963	up	0.00458415	2.07956	up	4.37e-23	3.17406	up	R	General function prediction only	hypothetical protein MBM_08313	C7Z9Q9	6e-23	#N/A	len=209	#N/A	#N/A	#N/A	#N/A	#N/A	No
secretary protein	common	MULT	BMK_Unigene_02363	1.38e-27	6.71819	up	3.19e-07	6.09184	up	2.14e-08	2.31554	up	S	Function unknown	hypothetical protein MBM_07809	C9SA38	3e-63	#N/A	len=332	#N/A	#N/A	#N/A	#N/A	#N/A	No
secretary protein	common	MULT	BMK_Unigene_07250	4.13e-05	5.33489	up	0.00139439	4.01737	up	2.26e-30	5.46037	up	R	General function prediction only	hypothetical protein MBM_02939	C9SBB2	7e-40	#N/A	len=175	#N/A	#N/A	#N/A	#N/A	#N/A	No
secretary protein	common	MULT	BMK_Unigene_03674	0.00251509	6.03769	up	4.07e-27	8.23178	up	2.34e-37	6.95066	up	R	General function prediction only	FAD dependent oxidoreductase family protein	C9SY65	1e-105	#N/A	len=499	#N/A	#N/A	#N/A	#N/A	#N/A	No
secretary protein	common	MULT	BMK_Unigene_10566	2.77e-17	6.36825	up	1.65e-21	9.35325	up	2.07e-46	8.59567	up	R	General function prediction only	hypothetical protein MBM_07463	D2XZ23	4e-96	#N/A	len=203	#N/A	#N/A	#N/A	#N/A	#N/A	No
secretary protein	common	MULT	BMK_Unigene_07307	1.68e-33	Inf	up	0.000146727	Inf	up	1.4e-63	Inf	up	R	General function prediction only	hypothetical protein MBM_09600	E3Q924	4e-12	#N/A	len=118	#N/A	#N/A	#N/A	#N/A	#N/A	No
secretary protein	common	MULT	BMK_Unigene_07046	3.41e-06	5.83505	up	0.0478775	4.75382	up	1.27e-36	6.08177	up	G	Carbohydrate transport and metabolism	BNR/Asp-box repeat domain containing protein	E3RLJ0	1e-98	#N/A	len=389	#N/A	#N/A	#N/A	#N/A	#N/A	No
secretary protein	common	MULT	BMK_Unigene_06291	6.58e-14	4.70648	up	0.0438129	2.68111	up	3.12e-26	4.20602	up	R	General function prediction only	putative mannan endo-1,4-beta-mannosidase	E4ZHV6	6e-131	#N/A	len=481	#N/A	#N/A	#N/A	#N/A	#N/A	No
secretary protein	common	MULT	BMK_Unigene_10720	0.000642964	Inf	up	0.0497411	Inf	up	1.92e-17	Inf	up	--	--	putative endoglucanase II	K1WG19	1e-55	#N/A	len=111	#N/A	#N/A	#N/A	#N/A	#N/A	No
secretary protein	common	MULT	BMK_Unigene_04602	0.0035549	5.53715	up	0.0140804	4.05187	up	1.17e-13	4.9726	up	--	--	hypothetical protein MBM_09420	K1WHN7	9e-32	#N/A	len=92	#N/A	#N/A	#N/A	#N/A	#N/A	No
candidate effector	common	MULT	BMK_Unigene_04792	4.07e-07	5.25119	up	0.012348	3.17913	up	9.91e-07	2.89061	up	K	Transcription	MYB DNA-binding domain-containing protein	#N/A	#N/A	0.622	len=218	I1RFQ3	GzMyb007	unaffected_pathogenicity	Fusarium_graminearum	5e-63	yes
candidate effector	common	MULT	BMK_Unigene_26783	2.19e-20	Inf	up	9.93e-44	Inf	up	3.94e-18	Inf	up	Z	Cytoskeleton	hypothetical protein, partial	#N/A	#N/A	0.951	len=71	Q7Z7T9	tub2	chemistry_target:_resistance_to_chemical	Monilinia_fructicola	4e-29	yes
candidate effector	common	MONO	BMK_Unigene_24657	1.34e-07	Inf	up	3.73e-38	Inf	up	3.3e-15	Inf	up	R	General function prediction only	putative ascorbate peroxidase	#N/A	#N/A	0.709	ExpAA=0.00	Q4PD66	um01947	reduced_virulence	Ustilago_maydis	2e-14	yes
candidate effector	common	MULT	BMK_Unigene_03714	1.63e-14	6.57065	up	5.37e-14	5.57017	up	1.39e-60	7.26753	up	--	--	--	#N/A	#N/A	0.719	len=57	#N/A	#N/A	#N/A	#N/A	#N/A	No
candidate effector	common	MULT	BMK_Unigene_05052	8.36e-22	6.73345	up	2.73e-05	4.15732	up	4.12e-50	5.89761	up	--	--	hypothetical protein MBM_09209	#N/A	#N/A	0.882	len=114	#N/A	#N/A	#N/A	#N/A	#N/A	No
candidate effector	common	MULT	BMK_Unigene_06167	0.0332412	5.791	up	1.85e-11	8.6095	up	3.97e-29	7.42588	up	--	--	hypothetical protein MBM_00254	#N/A	#N/A	0.859	len=91	#N/A	#N/A	#N/A	#N/A	#N/A	No
candidate effector	common	MULT	BMK_Unigene_07154	6.27e-26	6.68223	up	1.92e-12	4.88366	up	4.5e-53	5.88421	up	--	--	hypothetical protein MBM_08818	#N/A	#N/A	0.746	len=81	#N/A	#N/A	#N/A	#N/A	#N/A	No
candidate effector	common	MULT	BMK_Unigene_09394	1.78e-06	6.68902	up	4.66e-12	7.48246	up	6.1e-66	8.93119	up	--	--	hypothetical protein MBM_05217	#N/A	#N/A	0.823	len=115	#N/A	#N/A	#N/A	#N/A	#N/A	No
candidate effector	common	MULT	BMK_Unigene_10089	5.51e-05	3.74815	up	0.0247	2.1722	up	8.34e-13	2.72286	up	--	--	hypothetical protein MBM_07612	#N/A	#N/A	0.774	len=80	#N/A	#N/A	#N/A	#N/A	#N/A	No
candidate effector	common	MULT	BMK_Unigene_14593	0.000390701	Inf	up	8.36e-05	Inf	up	9.22e-23	Inf	up	--	--	hypothetical protein MBM_02130	#N/A	#N/A	0.947	len=81	#N/A	#N/A	#N/A	#N/A	#N/A	No
candidate effector	common	MULT	BMK_Unigene_21927	7.54e-19	Inf	up	8.77e-36	Inf	up	6.51e-71	Inf	up	--	--	--	#N/A	#N/A	0.833	len=42	#N/A	#N/A	#N/A	#N/A	#N/A	No
candidate effector	common	MULT	BMK_Unigene_22066	3.14e-44	Inf	up	9.75e-10	Inf	up	8.42e-18	Inf	up	--	--	--	#N/A	#N/A	0.571	len=30	#N/A	#N/A	#N/A	#N/A	#N/A	No
candidate effector	common	MULT	BMK_Unigene_24633	4.47e-07	Inf	up	1.19e-43	Inf	up	7.56e-65	Inf	up	--	--	hypothetical protein MBM_03364	#N/A	#N/A	0.941	len=70	#N/A	#N/A	#N/A	#N/A	#N/A	No
candidate effector	common	MULT	BMK_Unigene_25677	2.05e-20	Inf	up	0.000190616	Inf	up	0.000257277	Inf	up	--	--	--	#N/A	#N/A	0.575	len=69	#N/A	#N/A	#N/A	#N/A	#N/A	No
candidate effector	common	MULT	BMK_Unigene_26089	2.46e-29	Inf	up	1.5e-22	Inf	up	1.99e-27	Inf	up	--	--	--	#N/A	#N/A	0.567	len=43	#N/A	#N/A	#N/A	#N/A	#N/A	No
candidate effector	common	MULT	BMK_Unigene_27025	3.67e-14	Inf	up	1.83e-40	Inf	up	1.01e-20	Inf	up	--	--	--	#N/A	#N/A	0.734	len=53	#N/A	#N/A	#N/A	#N/A	#N/A	No
candidate effector	common	MULT	BMK_Unigene_27228	7.96e-23	Inf	up	1.54e-45	Inf	up	9.89e-28	Inf	up	--	--	--	#N/A	#N/A	0.85	len=44	#N/A	#N/A	#N/A	#N/A	#N/A	No
candidate effector	common	MULT	BMK_Unigene_27818	6.13e-19	Inf	up	3.7e-14	Inf	up	2.37e-13	Inf	up	--	--	--	#N/A	#N/A	0.632	len=33	#N/A	#N/A	#N/A	#N/A	#N/A	No
candidate effector	common	MULT	BMK_Unigene_28068	6.78e-25	Inf	up	6.62e-40	Inf	up	6.73e-46	Inf	up	--	--	--	#N/A	#N/A	0.921	len=41	#N/A	#N/A	#N/A	#N/A	#N/A	No
candidate effector	common	MULT	BMK_Unigene_28801	1.71e-42	Inf	up	4.74e-16	Inf	up	3.81e-07	Inf	up	--	--	--	#N/A	#N/A	0.633	len=66	#N/A	#N/A	#N/A	#N/A	#N/A	No
candidate effector	common	MULT	BMK_Unigene_29031	1.17e-22	Inf	up	9.69e-43	Inf	up	2.01e-67	Inf	up	--	--	--	#N/A	#N/A	0.628	len=37	#N/A	#N/A	#N/A	#N/A	#N/A	No
candidate effector	common	MULT	BMK_Unigene_29568	9.15e-22	Inf	up	1.01e-41	Inf	up	1.15e-09	Inf	up	A	RNA processing and modification	putative fibrillarin, partial	#N/A	#N/A	0.817	len=78	#N/A	#N/A	#N/A	#N/A	#N/A	No
candidate effector	common	MULT	BMK_Unigene_30296	2.53e-30	Inf	up	1.28e-42	Inf	up	1.74e-14	Inf	up	--	--	--	#N/A	#N/A	0.931	len=67	#N/A	#N/A	#N/A	#N/A	#N/A	No
candidate effector	common	MULT	BMK_Unigene_31032	9.95e-41	Inf	up	5.52e-32	Inf	up	7.97e-10	Inf	up	--	--	--	#N/A	#N/A	0.888	len=35	#N/A	#N/A	#N/A	#N/A	#N/A	No
candidate effector	common	MULT	BMK_Unigene_31749	3.94e-15	Inf	up	6.11e-27	Inf	up	6.68e-21	Inf	up	--	--	--	#N/A	#N/A	0.756	len=46	#N/A	#N/A	#N/A	#N/A	#N/A	No
candidate effector	common	MULT	BMK_Unigene_32914	5.64e-20	Inf	up	1.92e-45	Inf	up	1.17e-14	Inf	up	--	--	--	#N/A	#N/A	0.7	len=28	#N/A	#N/A	#N/A	#N/A	#N/A	No
candidate effector	common	MULT	BMK_Unigene_37155	7.21e-24	Inf	up	1.04e-07	Inf	up	1.81e-06	Inf	up	--	--	--	#N/A	#N/A	0.828	len=38	#N/A	#N/A	#N/A	#N/A	#N/A	No
candidate effector	common	MULT	BMK_Unigene_41090	6.9e-18	Inf	up	2.23e-27	Inf	up	4.08e-72	Inf	up	J	Translation, ribosomal structure and biogenesis	predicted protein	#N/A	#N/A	0.65	len=106	#N/A	#N/A	#N/A	#N/A	#N/A	No
candidate effector	common	MULT	BMK_Unigene_45864	1.63e-23	Inf	up	3.9e-38	Inf	up	1.67e-14	Inf	up	--	--	hypothetical protein	#N/A	#N/A	0.655	len=34	#N/A	#N/A	#N/A	#N/A	#N/A	No
candidate effector	common	MULT	BMK_Unigene_46787	2.87e-24	Inf	up	1.07e-24	Inf	up	6.93e-59	Inf	up	--	--	--	#N/A	#N/A	0.604	len=25	#N/A	#N/A	#N/A	#N/A	#N/A	No
candidate effector	common	MONO	BMK_Unigene_25628	2.89e-11	Inf	up	1.58e-24	Inf	up	1.37e-19	Inf	up	--	--	--	#N/A	#N/A	0.851	ExpAA=0.01	#N/A	#N/A	#N/A	#N/A	#N/A	No
candidate effector	common	MONO	BMK_Unigene_25677	2.24e-41	Inf	up	3.29e-16	Inf	up	5.84e-26	Inf	up	--	--	--	#N/A	#N/A	0.575	ExpAA=0.00	#N/A	#N/A	#N/A	#N/A	#N/A	No
candidate effector	common	MONO	BMK_Unigene_26957	3.08e-09	Inf	up	1.34e-20	Inf	up	1.26e-17	Inf	up	--	--	--	#N/A	#N/A	0.565	ExpAA=0.38	#N/A	#N/A	#N/A	#N/A	#N/A	No
candidate effector	common	MONO	BMK_Unigene_27025	5.54e-26	Inf	up	1.89e-73	Inf	up	7e-27	Inf	up	--	--	--	#N/A	#N/A	0.734	ExpAA=0.00	#N/A	#N/A	#N/A	#N/A	#N/A	No
candidate effector	common	MONO	BMK_Unigene_27818	3.19e-10	Inf	up	2.48e-38	Inf	up	1.22e-13	Inf	up	--	--	--	#N/A	#N/A	0.632	ExpAA=0.00	#N/A	#N/A	#N/A	#N/A	#N/A	No
candidate effector	common	MONO	BMK_Unigene_28801	2.24e-21	Inf	up	1.49e-14	Inf	up	2.37e-25	Inf	up	--	--	--	#N/A	#N/A	0.633	ExpAA=0.00	#N/A	#N/A	#N/A	#N/A	#N/A	No
candidate effector	common	MONO	BMK_Unigene_29568	6.73e-34	Inf	up	4.05e-08	Inf	up	1.55e-34	Inf	up	A	RNA processing and modification	putative fibrillarin, partial	#N/A	#N/A	0.817	ExpAA=0.67	#N/A	#N/A	#N/A	#N/A	#N/A	No
candidate effector	common	MONO	BMK_Unigene_31032	9.48e-10	Inf	up	1.24e-08	Inf	up	4.75e-25	Inf	up	--	--	--	#N/A	#N/A	0.888	ExpAA=0.00	#N/A	#N/A	#N/A	#N/A	#N/A	No
candidate effector	common	MONO	BMK_Unigene_32749	5.62e-32	Inf	up	7.86e-61	Inf	up	4.03e-16	Inf	up	--	--	--	#N/A	#N/A	0.602	ExpAA=0.02	#N/A	#N/A	#N/A	#N/A	#N/A	No
candidate effector	common	MONO	BMK_Unigene_39304	0.0274775	4.05393	up	1.44e-82	9.43455	up	0.000406059	6.69576	up	--	--	--	#N/A	#N/A	0.899	ExpAA=14.03	#N/A	#N/A	#N/A	#N/A	#N/A	No
candidate effector	common	MONO	BMK_Unigene_45864	4.96e-12	Inf	up	0.041071	Inf	up	3.06e-23	Inf	up	--	--	hypothetical protein	#N/A	#N/A	0.655	ExpAA=0.00	#N/A	#N/A	#N/A	#N/A	#N/A	No
